# Supplementary material
Source: PubMed Central journal article supplement (PMC5645785)
Supplement: NIHMS870363-supplement-supplemental_information.pdf [file NIHMS870363-supplement-supplemental_information.pdf]

## SUPPLEMENTARY INFORMATION

**Fig S1. Determination of kinetic constants of RMGPa, EcGS and SuSy4.** Plots of initial reaction velocity ( $V_o$ ) versus substrate concentration. RMGPa was tested in the direction of glycogen phosphorolysis (A, B) and glycogen synthesis (C, D). EcGS (E, F) and SuSy4 (G, H) were tested in the direction glycogen and sucrose synthesis, respectively. The variable substrate is indicated in the X-axes of the plots. All experiments were performed at pH 7 and 30 °C in HEPES buffer. The plotted values represent the mean of three independent measurements.

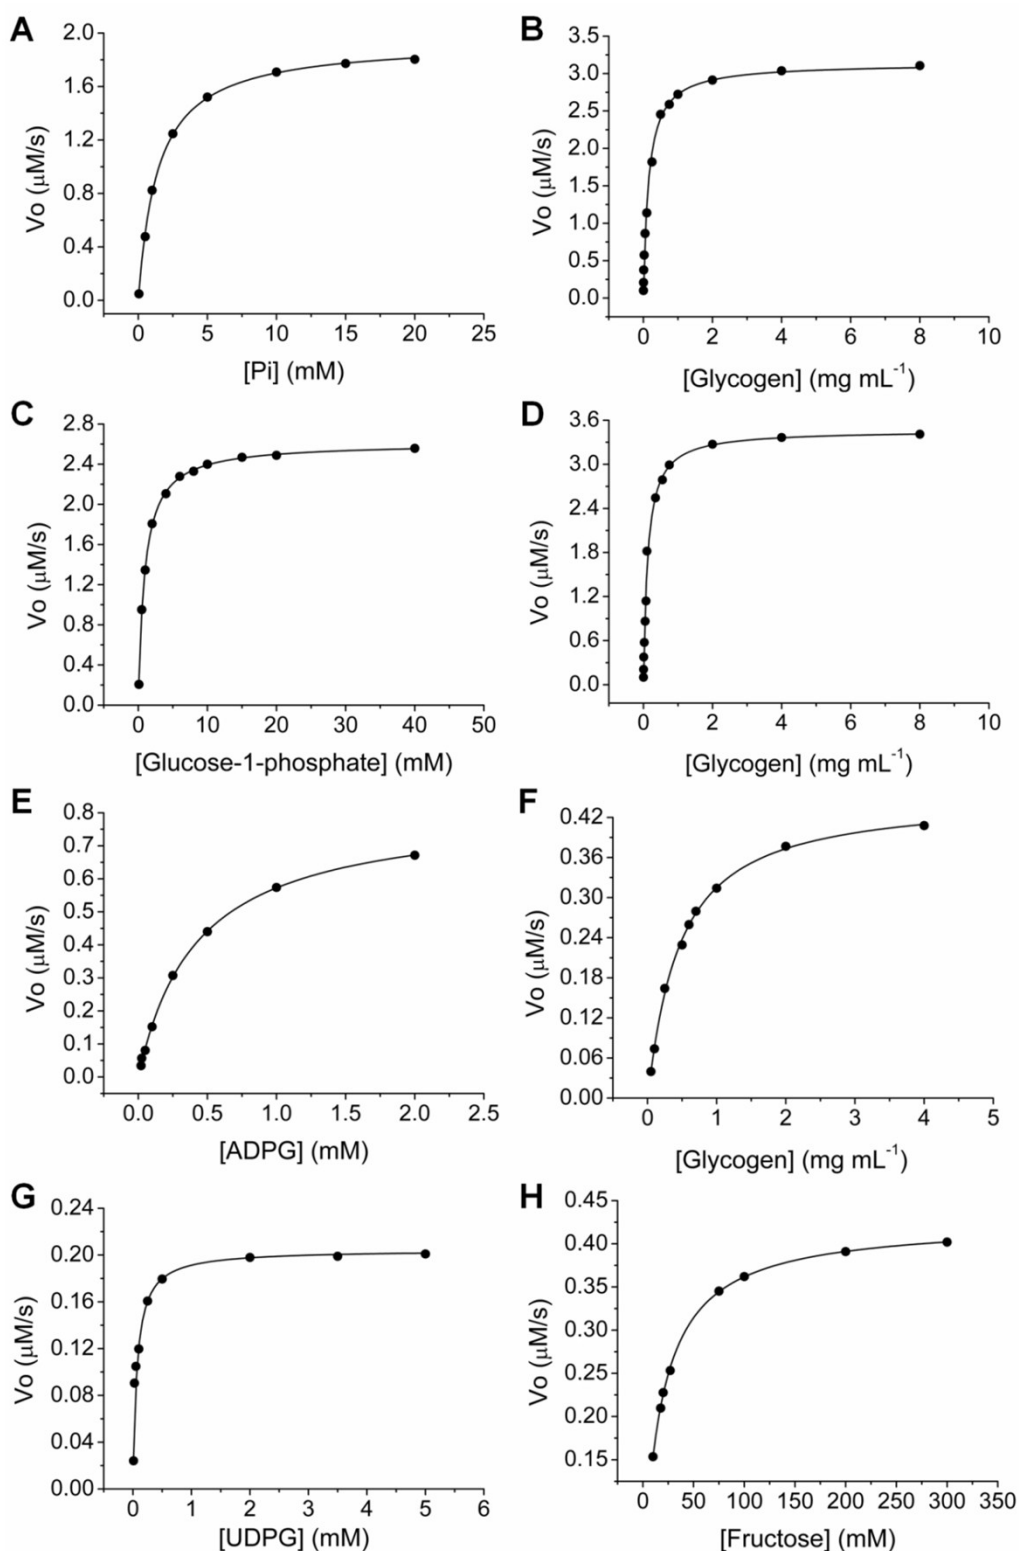

**Table S2.** Kinetic parameters of RMGP $\alpha$  in the direction of glycogen degradation and synthesis, and EcGS and SuSy4 in the direction of glycogen and sucrose synthesis, respectively. All experiments were performed at pH 7 and 30 °C in HEPES buffer.

| Enzyme                                        | Substrate | $K_m$                           | $V_{max}$ (mmol min <sup>-1</sup> mg <sup>-1</sup> protein) |
|-----------------------------------------------|-----------|---------------------------------|-------------------------------------------------------------|
| RMGP $\alpha$<br>(glycogen<br>phosphorolysis) | Pi        | 1.41 ± 0.04 mM                  | 11.65 ± 0.08                                                |
|                                               | Glycogen  | 0.15 ± 0.01 mg mL <sup>-1</sup> | 18.82 ± 0.03                                                |
| RMGP $\alpha$<br>(glycogen<br>synthesis)      | Glc-1-P   | 0.92 ± 0.02 mM                  | 66.0 ± 0.3                                                  |
|                                               | Glycogen  | 0.12 ± 0.01 mg mL <sup>-1</sup> | 83.2 ± 0.03                                                 |
| EcGS                                          | ADPG      | 0.42 ± 0.01 mM                  | 348.7 ± 0.4                                                 |
|                                               | Glycogen  | 0.47 ± 0.01 mg mL <sup>-1</sup> | 197.7 ± 0.3                                                 |
| SuSy 4                                        | UDPG      | 0.069 ± 0.009 mM                | 3.07 ± 0.01                                                 |
|                                               | Fructose  | 17.7 ± 0.4 mM                   | 6.38 ± 0.07                                                 |
